# Supplementary material
Source: PubMed Central journal article supplement (PMC2868572)
Supplement: emboj201032s3.pdf [file emboj201032s3.pdf]

Manuscript EMBO-2009-73540

## **Phosphatidylinositol-(4,5)-Bisphosphate enables efficient secretion of HIV-1 Tat by infected T-cells**

Fabienne Rayne, Solène Debaisieux, Hocine Yezid, Yea-Lih Lin, Clément Mettling, Karidia Konate, Nathalie Chazal, Stefan Arold, Martine Pugnère, Françoise Sanchez, Anne Bonhoure, Mrs. Laurence Briant, Erwan Loret, Christian Roy and Bruno Beaumelle

*Corresponding author: Bruno Beaumelle, CPBS*

---

### **Review timeline:**

Submission date:

29 December 2009

Accepted:

17 February 2010

---

### **Transaction Report:**

No Peer Review Process File is available with this article, as the authors have chosen not to make the review process public in this case.
